# Supplementary material
Source: HighWire-hosted journal article supplement (https://nutrition.bmj.com/content/bmjnph-2020-000210)
Supplement: inline-supplementary-material-6 [file inline-supplementary-material-6.pdf]

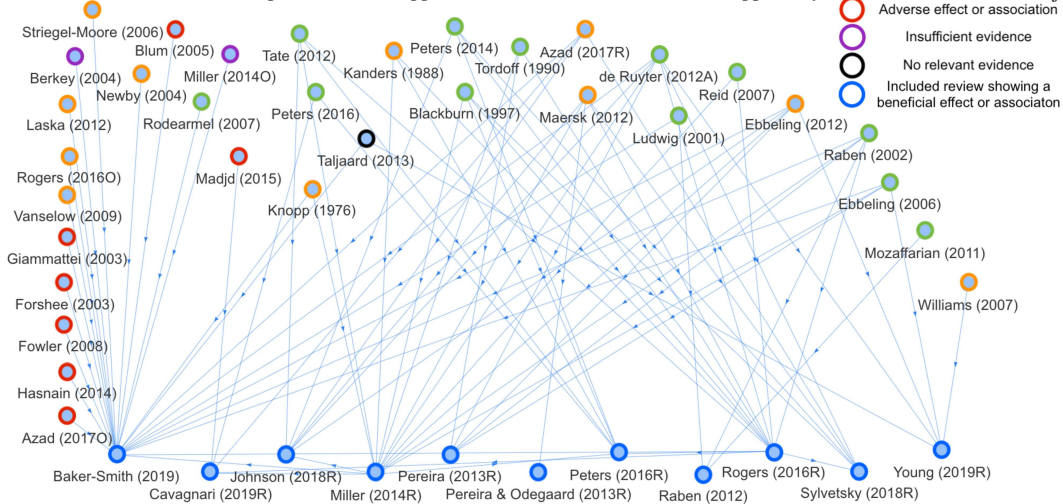

Figure S3: Network analysis based on evidence assessment units concluding a beneficial effect or association of low-energy sweeteners with body weight (n=11). Cited articles (n=33) are marked based on the conclusion of the article
