# Supplementary material
Source: HighWire-hosted journal article supplement (https://nutrition.bmj.com/content/bmjnph-2020-000210)
Supplement: inline-supplementary-material-7 [file inline-supplementary-material-7.pdf]

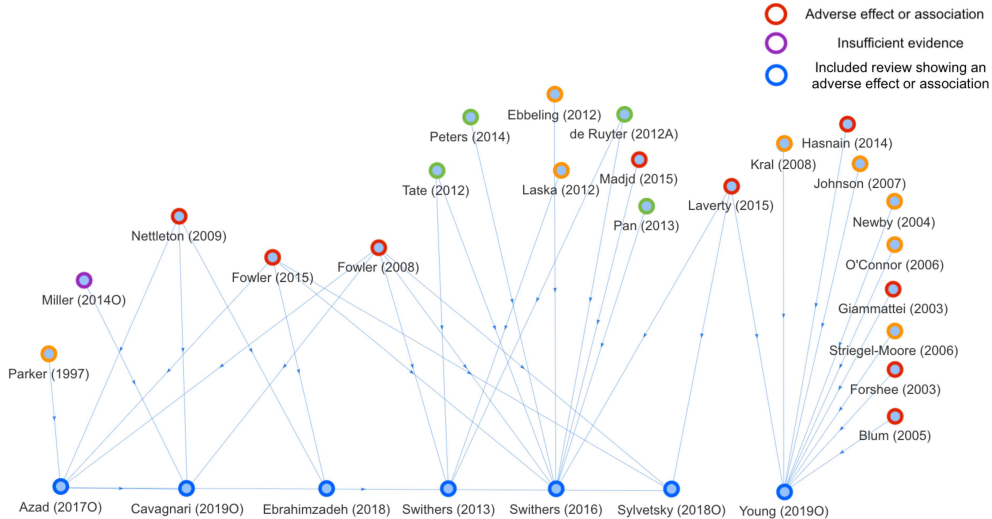

Figure S4: Network analysis based on evidence assessment units concluding an adverse effect or association of low-energy sweeteners with body weight (n=7). Cited articles (n=22) are marked based on the conclusion of the article.
